# Supplementary material
Source: Royal Society of Chemistry journal article supplement (doi:10.1039/d6ce00266h)
Supplement: d6ce00266h1.pdf [file d6ce00266h1.pdf]

# Supplementary Information

for

## Binary-filler engineering of ZIF-8 and mesoporous silica in PEBAX mixed-matrix membranes toward enhanced CO<sub>2</sub> separation performance

Joy Thomas<sup>a</sup>, Chien-Hua Chen<sup>b\*</sup>, Gun Yi Park<sup>c</sup>, Pei-Shan Hsu<sup>c</sup>, Po-Chun Wu<sup>c</sup>, Sher-Ling Lee<sup>c</sup>, Cheng-  
Liang Liu<sup>a</sup>,  
Dun-Yen Kang<sup>c\*</sup>

<sup>a</sup> Department of Materials Science and Engineering, National Taiwan University, Taiwan, 10617

<sup>b</sup> Department of Chemical and Materials Engineering, National Ilan University, Yilan City 260007, Taiwan

<sup>c</sup> Department of Chemical Engineering, National Taiwan University, Taiwan, 10617

### Corresponding authors:

Chien-Hua Chen, email: [jefferychen@niu.edu.tw](mailto:jefferychen@niu.edu.tw)

Dun-Yen Kang, email: [dunyen@ntu.edu.tw](mailto:dunyen@ntu.edu.tw)

## Supplementary Figures

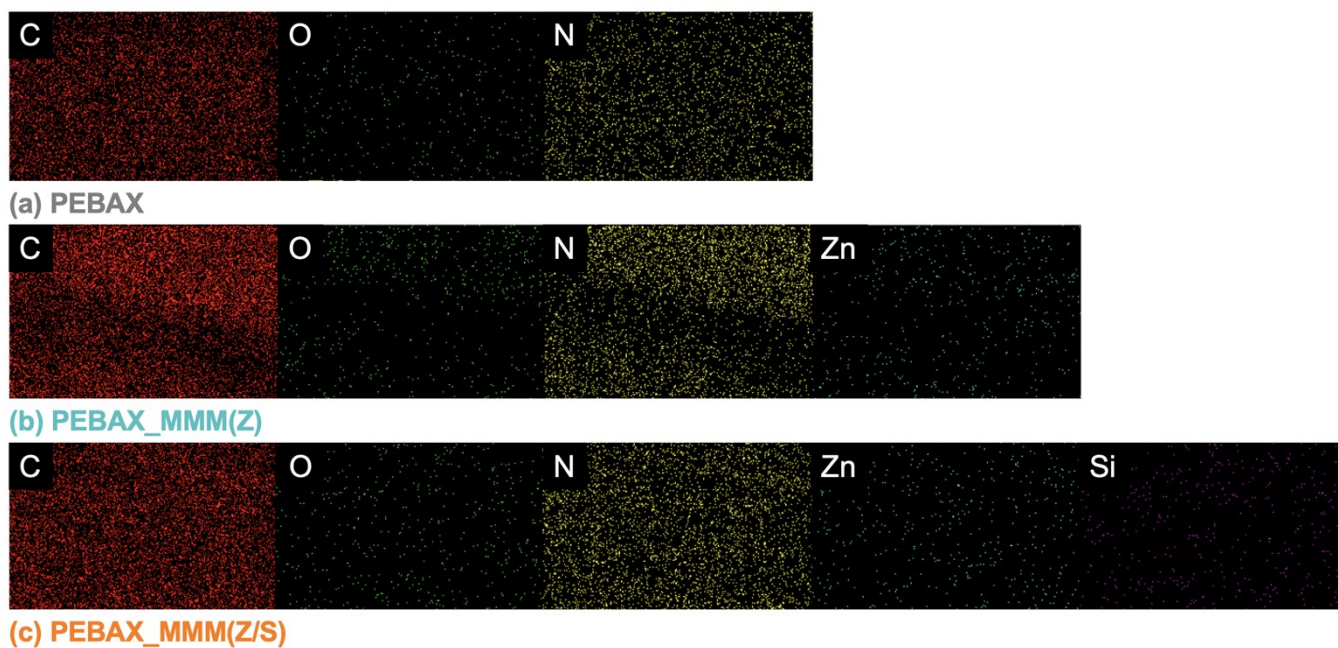

Fig. S1 EDS elemental mapping images of (a) pristine PEBAX, (b) PEBAX\_MMM(Z), and (c) PEBAX\_MMM(Z/S) membranes showing the distribution of C, O, N, Zn, and Si elements.

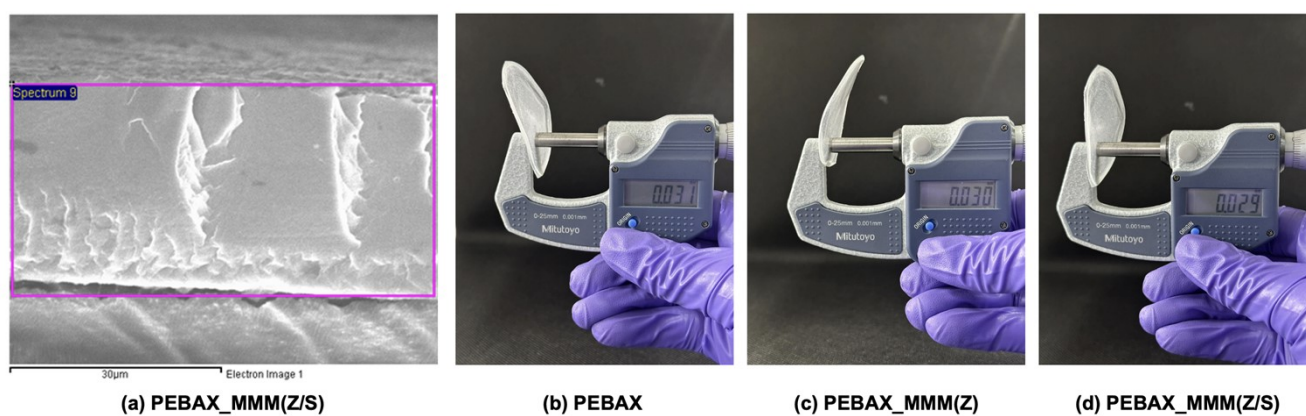

Fig. S2 Low-magnification cross-sectional SEM image of the PEBAX\_MMM(Z/S) membrane (a) and thickness measurements of (b) pristine PEBAX, (c) PEBAX\_MMM(Z), and (d) PEBAX\_MMM(Z/S) membranes, showing comparable membrane thicknesses of approximately  $30 \pm 1 \mu\text{m}$ .

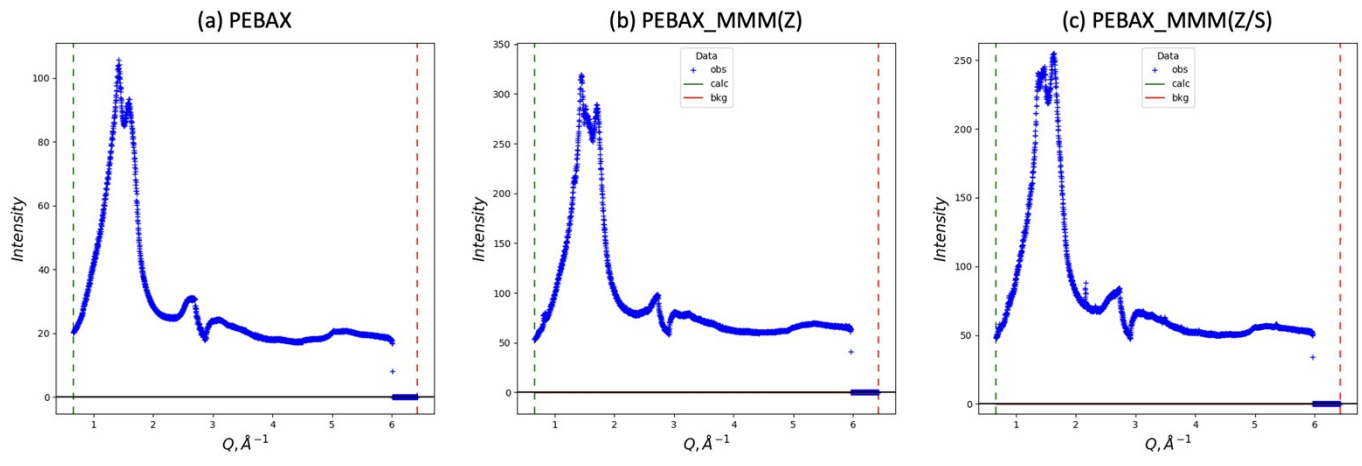

Fig. S3 Azimuthally integrated 1D GIWAXS profiles derived from the 2D GIWAXS patterns of (a) pristine PEBAX, (b) PEBAX\_MMM(Z), and (c) PEBAX\_MMM(Z/S) membranes.

## Supplementary Tables

Table S1. Gas separation performance of PEBAX\_MMM(Z) membrane (CO<sub>2</sub>/N<sub>2</sub> feed ratio 50:50).

| PEBAX_MMM(Z)              | Gas             | Temperature | Total press. | Partial press. | Permeance                       | Permeability    | Selectivity |
|---------------------------|-----------------|-------------|--------------|----------------|---------------------------------|-----------------|-------------|
| <i>feed gas ratio (%)</i> | <i>[-]</i>      | <i>[K]</i>  | <i>[bar]</i> | <i>[bar]</i>   | <i>[mol/s/m<sup>2</sup>/Pa]</i> | <i>[Barrer]</i> | <i>[-]</i>  |
| 50                        | CO <sub>2</sub> | 291         | 2.01         | 1.005          | $1.77 \times 10^{-9}$           | 217.74          | 31.0        |
| 50                        | N <sub>2</sub>  |             |              | 1.005          | $5.72 \times 10^{-11}$          | 7.03            |             |

Preliminary mixed-gas permeation performance of PEBAX\_MMM(Z) membrane under a CO<sub>2</sub>/N<sub>2</sub> feed ratio of 50:50. Data represent a single measurement under dry-feed conditions (2.01 bar total pressure, 291 K). The reported values are preliminary and require systematic replicate measurements and humidified-feed evaluation to confirm the mixed-gas separation behavior, which will be reported in a dedicated follow-up study.

Table S2. Gas separation performance of PEBAX\_MMM(Z/S) membrane (CO<sub>2</sub>/N<sub>2</sub> feed ratio 50:50).

| PEBAX_MMM(Z/S)            | Gas             | Temperature | Total press. | Partial press. | Permeance                       | Permeability    | Selectivity |
|---------------------------|-----------------|-------------|--------------|----------------|---------------------------------|-----------------|-------------|
| <i>feed gas ratio (%)</i> | <i>[-]</i>      | <i>[K]</i>  | <i>[bar]</i> | <i>[bar]</i>   | <i>[mol/s/m<sup>2</sup>/Pa]</i> | <i>[Barrer]</i> | <i>[-]</i>  |
| 50                        | CO <sub>2</sub> | 291         | 2.01         | 1.005          | $5.01 \times 10^{-10}$          | 51.08           | 10.8        |
| 50                        | N <sub>2</sub>  |             |              | 1.005          | $4.65 \times 10^{-11}$          | 4.74            |             |

Preliminary mixed-gas permeation performance of PEBAX\_MMM(Z/S) membrane under a CO<sub>2</sub>/N<sub>2</sub> feed ratio of 50:50. Data represent a single measurement under dry-feed conditions (2.01 bar total pressure, 291 K). The reported values are preliminary and require systematic replicate measurements and humidified-feed evaluation to confirm the mixed-gas separation behavior, which will be reported in a dedicated follow-up study.
